# Supplementary material
Source: Research Square preprint supplement (doi:10.21203/rs.3.rs-9025329/v1)
Supplement: Supplementary file 1 [file 5ee4c7c7565399ec635c39c7.docx]

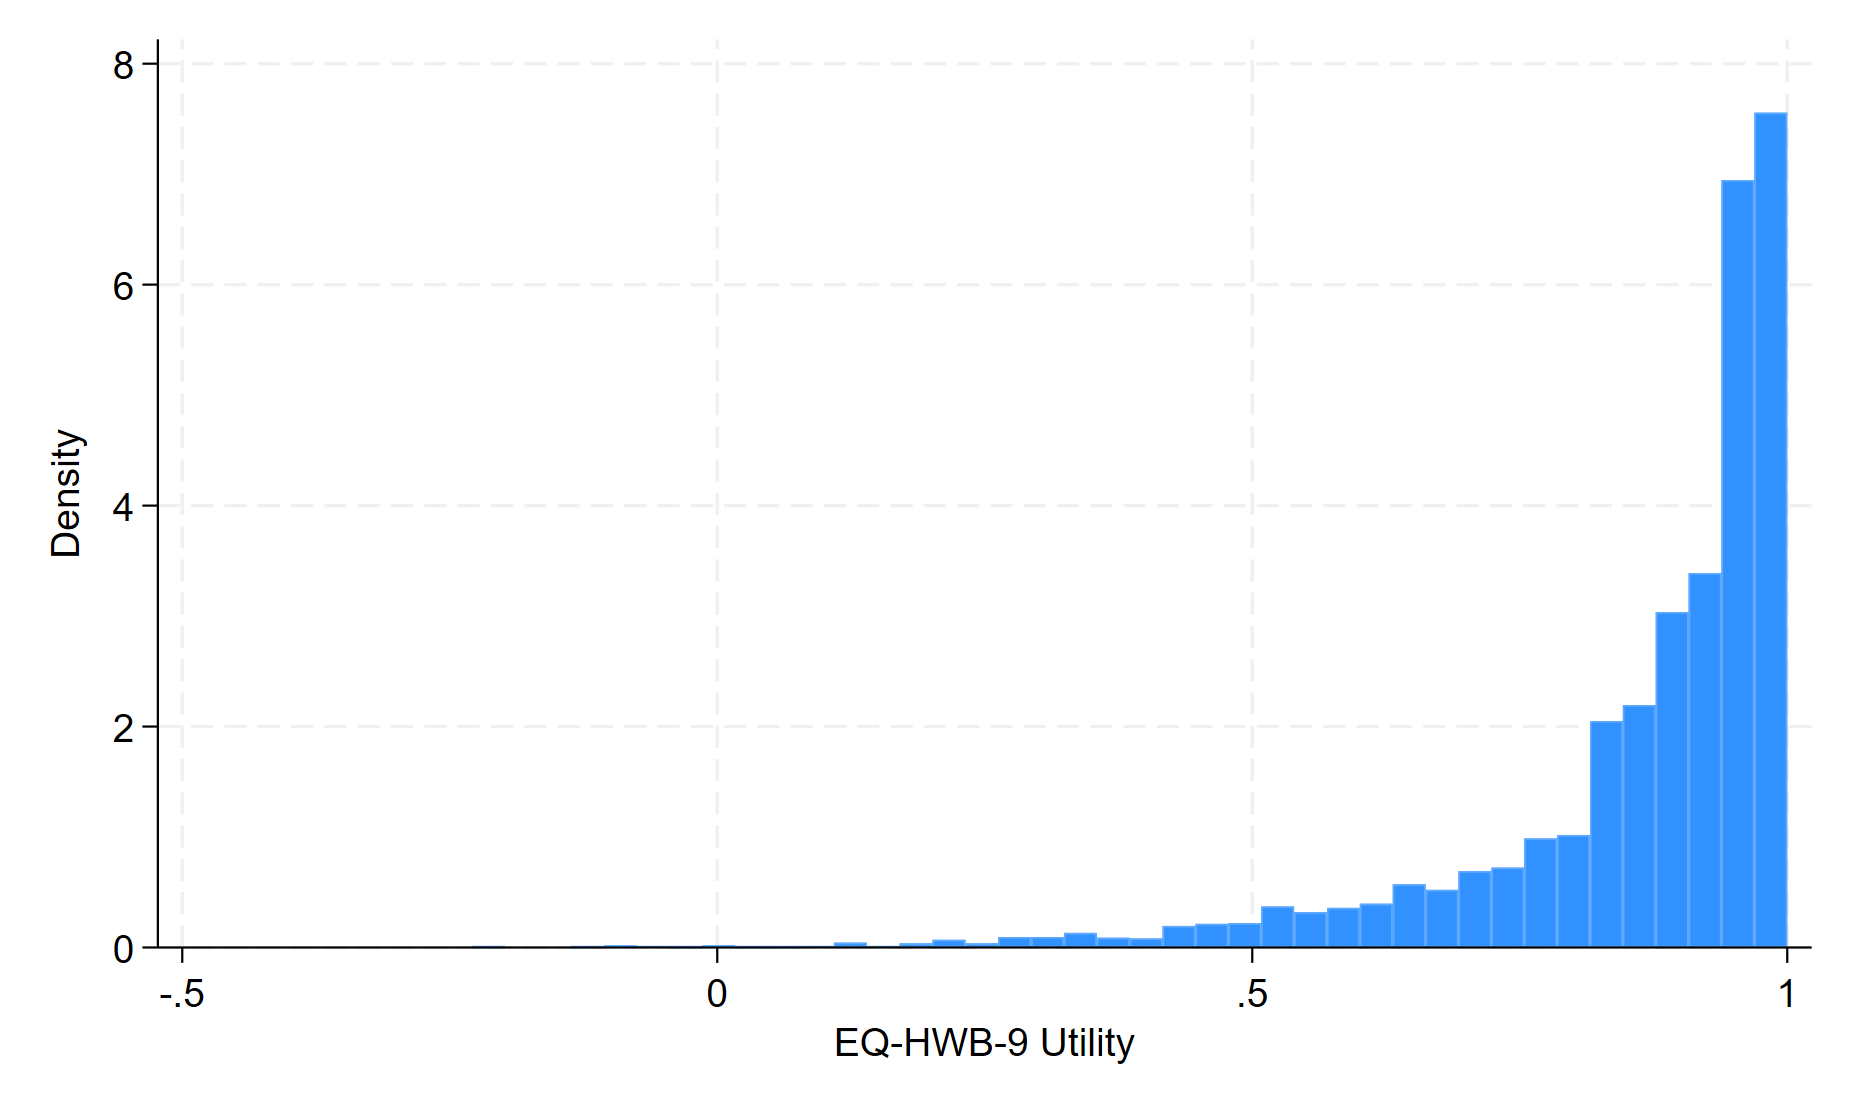


**Figure S1. Distribution of EQ-HWB-9 utility scores.**

Density histogram of EQ-HWB-9 utility scores in the study sample, illustrating the overall distribution and upper-bound clustering.
