# Supplementary material
Source: Research Square preprint supplement (doi:10.21203/rs.3.rs-9025329/v1)
Supplement: Supplementary file 2 [file eaa97cfc195050967630ca04.docx]

**Supplementary Table S1**

|  | Model 1 | Model 2 | Model 3 | Model 4 |
| --- | --- | --- | --- | --- |
|  | Coefficient (95%CI) | Coefficient (95%CI) | Coefficient (95%CI) | Coefficient (95%CI) |
| Age | **0.0017***  (0.0015 to 0.0020) | **0.0026***  (0.0023 to 0.0028) | **0.0032***  (0.0028 to 0.0038) | **0.0033***  (0.0027 to 0.0038) |
| Sex | **-0.0195***  (-0.0280 to -0.0110) | **-0.0232***  (-0.0316 to -0.0152) | **-0.0259***  (-0.0404 to -0.0115) | **-0.0252***  (-0.0402 to -0.0101) |
| Multimorbidity  1  2  3+ |  | **-0.0545***  (-0.0661 to -0.0429)  **-0.0633***  (-0.0775 to -0.0490)  **-0.1321***  (-0.147 to -0.1173) | 0.0165  (-0.0107 to 0.0440)  0.0087  (-0.0213 to 0.0387)  **-0.0433***  (-0.0767 to -0.0098) | 0.0234  (-0.0044 to 0.0513)  0.0206  (-0.0122 to 0.0534)  -0.1344  (-0.0570 to 0.0301) |
| Diabetes (n=224) |  |  | -0.0007  (-0.0306 to 0.0166) | -0.0149  (-0.0391 to 0.0092) |
| Obesity (n=33) |  |  |  | **-0.0785***  (-0.1353 to -0.0217) |
| Dyslipidemia (n=301) |  |  |  | **0.0238***  (0.0011 to 0.0465) |
| Thyroid disease (n=77) |  |  |  | -0.0113  (-0.0490 to 0.0263) |
| Depression (n=248) |  |  | **-0.1243***  (-0.1476 to -0.1010) | **-0.1219***  (-0.1458 to -0.0981) |
| Dementia (n=5) |  |  |  | -0.1403  (-0.2862 to 0.0055) |
| Parkinsons disease (n=6) |  |  |  | -0.1625  (-0.2937 to 0.0313) |
| Eye diseases (n=280) |  |  | 0.0216  (-0.0007 to 0.0439) | 0.0141  (-0.0087 to 0.0369) |
| Ear diseases (n=36) |  |  |  | -0.0226  (-0.0765 to 0.0313) |
| Hypertension (n=538) |  |  | 0.0071  (-0.0108 to 0.0250) | 0.0124  (-0.0187 to 0.0189) |
| Stroke (n=32) |  |  |  | -0.0405  (-0.0980 to 0.0170) |
| Angina, Myocardial infarction (n=67) |  |  | -0.0278  (-0.0683 to 0.0129) | -0.0309  (-0.0715 to 0.0095) |
| Allergic rhinitis (n=111) |  |  |  | -0.0246  (-0.0573 to 0.0080) |
| COPD (n=11) |  |  |  | -0.1525  (-0.2483 to 0.0567) |
| Asthma (n=73) |  |  |  | -0.0288  (-0.0677 to 0.0101) |
| Stomach and duodenal diseases (n=65) |  |  |  | -0.0167  (-0.0570 to 0.0235) |
| Liver and gallbladder diseases (n=21) |  |  |  | -0.0742  (-0.1441 to 0.0043) |
| Dental diseases (n=353) |  |  |  | 0.0003  (-0.0197 to 0.0203) |
| Atopic dermatitis (n=83) |  |  |  | 0.0325  (-0.0048 to 0.0698) |
| Gout (n=57) |  |  |  | -0.0214  (-0.0647 to 0.0218) |
| Rheumatoid arthritis (n=28) |  |  |  | -0.0051  (-0.0654 to 0.0552) |
| Arthritis (n=86) |  |  | **-0.0605***  (-0.0966 to -0.0244) | **-0.0648***  (-0.1008 to -0.0288) |
| Shoulder stiffness (n=103) |  |  |  | -0.0170  (-0.0520 to 0.0179) |
| Lower backpain (n=177) |  |  | **-0.0763***  (-0.1027 to -0.0500) | **-0.0450***  (-0.1030 to 0.0470) |
| Osteoporosis (n=90) |  |  |  | -0.0292  (-0.0655 to 0.0071) |
| Kidney disease (n=39) |  |  |  | -0.0280  (-0.0543 to 0.0487) |
| Benign prostatic hyperplasia (48) |  |  |  | 0.0158  (-0.0322 to 0.0628) |
| Fractures (n=30) |  |  |  | **-0.1645***  (-0.2226 to -0.1065) |
| Anemia and blood disorders (n=28) |  |  |  | -0.0497  (-0.1104 to 0.0110) |
| Cancer (n=60) |  |  |  | -0.0217  (-0.0643 to 0.0210) |
| cons | **0.7674***  (0.7468 to 0.7880) | **0.7997***  (0.7812 to 0.8182) | **0.7083***  (0.6664 to 0.7502) | **0.7074***  (0.6644 to 0.7504) |

*Bolded values indicate significant differences at p < 0.05.

Model 1: Adjusted for age and sex.

Model 2: Model 1 + multimorbidity category.

Model 3: Model 2 + selected health conditions.

Model 4: Model 3 + all other health conditions.

Reference category: absence of the condition.
